# Supplementary material
Source: PubMed Central journal article supplement (PMC5479617)
Supplement: a86b349c3891755c0f8885aa386333dd_2016_149252-Disclosures_and_Contributions.pdf [file a86b349c3891755c0f8885aa386333dd_2016_149252-Disclosures_and_Contributions.pdf]

Haematologica  
HAEMATOL/2016/149252  
Version 3

Trained immunity: consequences for lymphoid malignancies

Wendy B.C. Stevens, Mihai G. Netea, Arnon P. Kater, and Walter  
J.F.M. van der Velden

Disclosures: No conflicts to report. Acknowledgements MGN was supported by an ERC Consolidator Grant (#310372).

Contributions: All authors (WS, MN, AK, WV) wrote the manuscript, provided intellectual input, corrected and approved the final version. WV drew up the figures.
